# Supplementary material for: “Two Birds with One Stone”: F Doping Ni–Co Hydroxide as High-Performance Cathode Material for Aqueous Zn Batteries
Source: MDPI journal article supplement (doi:10.3390/nano12101780), 2022-05-23
Supplement: s1 [file s1]

Supporting Information

# “Two Birds with One Stone”: F Doping Ni–Co Hydroxide as High-Performance Cathode Material for Aqueous Zn Batteries

Wen Liu, Qiwen Zhao, Yunyun Wang, Yuejiao Chen \* and Libao Chen \*

State Key Laboratory of Powder Metallurgy, Central South University, Changsha 410083, China; levinesky12@163.com (W.L.); qiwen9259@163.com (Q.Z.); cloudsays@163.com (Y.W.)

\* Correspondence: cyj.strive@csu.edu.cn (Y.C.); lbchen@csu.edu.cn (L.C.)

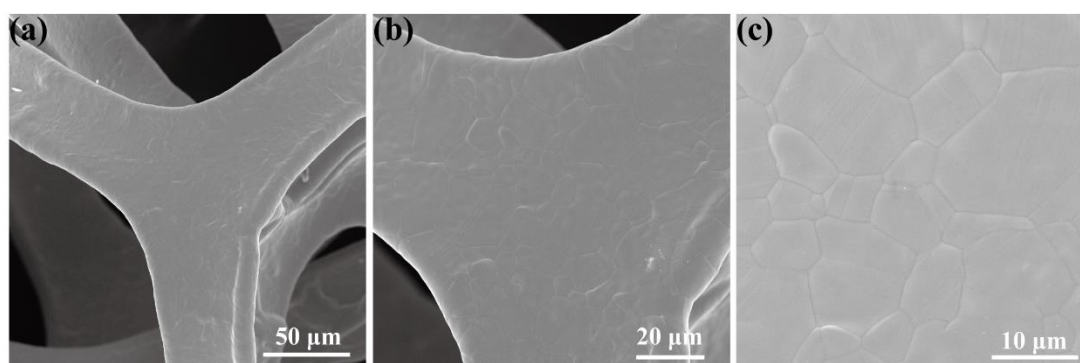

**Figure S1.** SEM image of Ni foam substrate (a) 50  $\mu\text{m}$ ; (b) 20  $\mu\text{m}$ ; (c) 10  $\mu\text{m}$ .

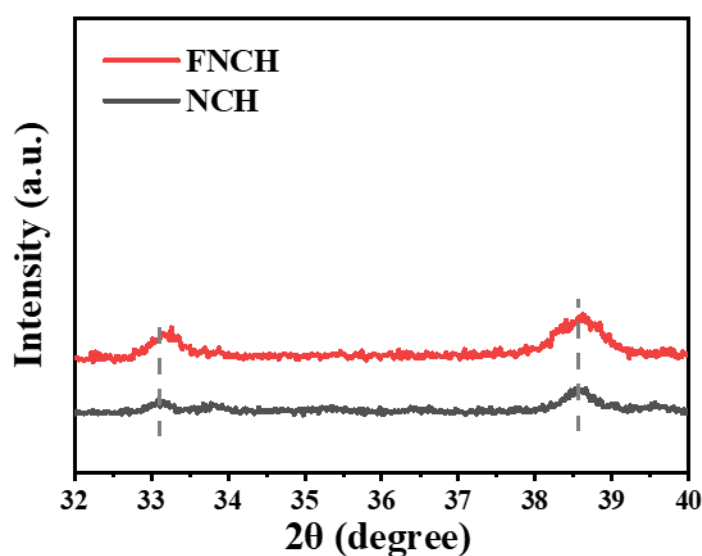

**Figure S2.** Comparison of diffraction peaks between 32° to 40° in FNCH and NCH.

**Table S1.** The results of SEM EDX mapping.

| Element | NCH (Atomic%) | FNCH (Atomic%) |
|---------|---------------|----------------|
| O       | 64.1          | 62.3           |
| Co      | 20.8          | 19             |
| Ni      | 14.7          | 14             |
| F       | 0.4           | 4.7            |

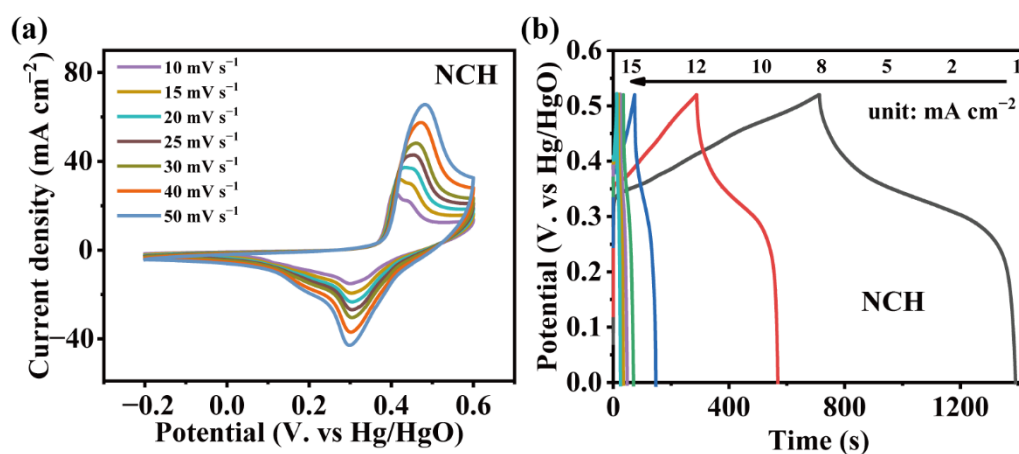

Figure S3. CV curves (a) and GCD curves (b) of NCH.

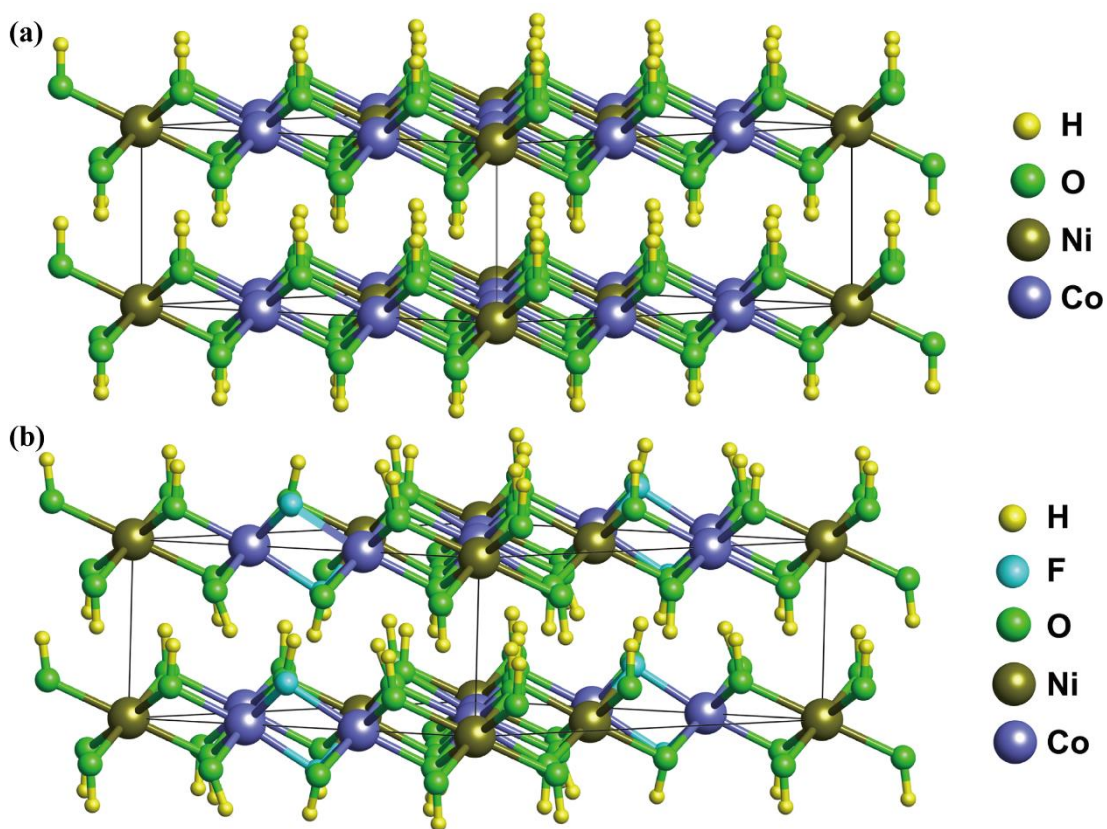

Figure S4. Ball and stick models of the structure of NCH (a) and FCNH (b).

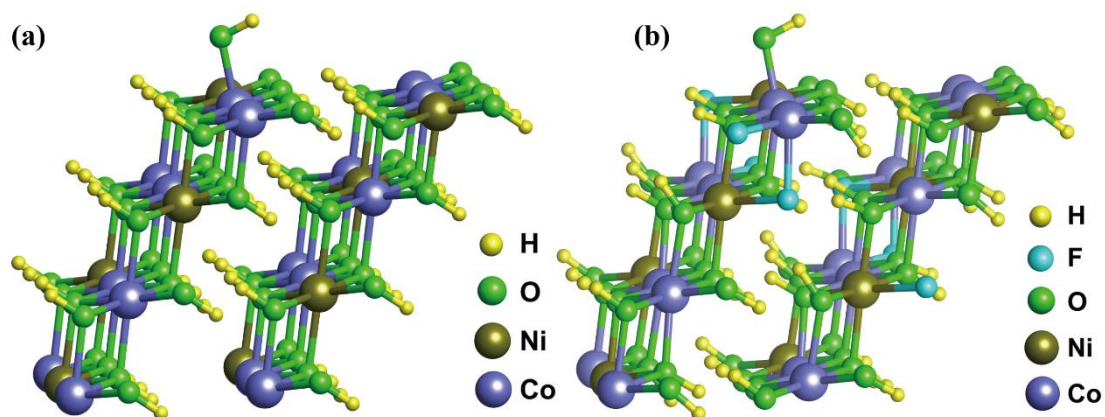

Figure S5. Models of the calculation of  $\text{OH}^-$  adsorption on NCH (a) and FNCH (b).

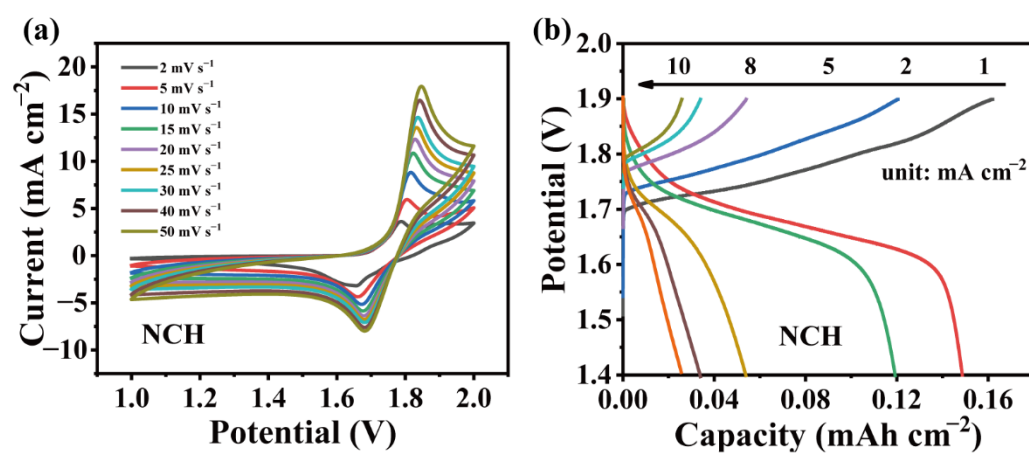

Figure S6. CV curves (a) and GCD curves (b) of NCH//Zn battery.
